# Supplementary material for: Taxonomic and Functional Diversity of Benthic Macroinvertebrate Assemblages in Reservoirs of South Korea
Source: MDPI journal article supplement (doi:10.3390/ijerph20010673), 2022-12-30
Supplement: s1 [file s1]

Table S1. List of taxa collected from 20 reservoirs in the Nakdong River catchment, South Korea.

| Reservoir   | Acronym | Location (GPS)               | Elevation<br>(m) | Sampled Year<br>(No. sampling) |
|-------------|---------|------------------------------|------------------|--------------------------------|
| Andong      | AnDn    | 36°7'48.51"N,128°50'12.18"E  | 155              | 2016(2)                        |
| Angye       | AnGy    | 36°0'35.60"N,129°15'50.71"E  | 45               | 2016(2)                        |
| Bomun       | BoMn    | 35°50'39.72"N,129°16'32.19"E | 97               | 2009(2)                        |
| Bongsan     | BnSn    | 35°26'2.93"N,128°29'28.77"E  | 8                | 2014(1);2017(1)                |
| Daeam       | DaAm    | 35°32'25.83"N,129°10'43.91"E | 51               | 2016(2)                        |
| Deokdong    | DkDn    | 35°50'15.86"N,129°18'40.38"E | 167              | 2009(2)                        |
| Gucheon     | GuCh    | 34°49'31.14"N,128°38'14.02"E | 92               | 2009(2)                        |
| Gyeongcheon | GyCh    | 36°42'20.90"N,128°18'39.01"E | 233              | 2014(2)                        |
| Hapcheon    | HpCh    | 35°33'55.08"N,128°2'13.70"E  | 181              | 2009(2)                        |
| Hoeya       | HoYa    | 35°28'15.87"N,129°16'11.64"E | 30               | 2016(2)                        |
| Imha        | ImHa    | 36°31'32.53"N,128°53'28.02"E | 158              | 2009(2)                        |
| Jangcheok   | JnCh    | 35°25'55.02"N,128°29'39.25"E | 13               | 2014(1),2017(1)                |
| Jinyang     | JnYa    | 35°9'25.45"N,127°59'12.91"E  | 39               | 2017(2)                        |
| Otae        | OoTa    | 36°29'29.13"N,128°7'17.49"E  | 82               | 2009(2)                        |
| Sayeon      | SaYn    | 35°35'14.25"N,129°11'9.11"E  | 58               | 2016(2)                        |
| Seonam      | SnAm    | 35°30'58.55"N,129°19'43.54"E | 25               | 2016(2)                        |
| Unmun       | WnMn    | 35°43'50.57"N,128°56'13.01"E | 134              | 2017(2)                        |
| Yeoncho     | YnCh    | 34°56'13.31"N,128°40'16.67"E | 44               | 2009(2)                        |
| Yeongcheon  | YnCn    | 36°4'16.09"N,129°1'36.09"E   | 153              | 2017(2)                        |
| Yongyeon    | YoYn    | 36°07'38.01"N,129°17'45.06"E | 57               | 2016(2)                        |

**Table S2.** List of taxa collected from 20 reservoirs in the Nakdong River catchment, South Korea.

| Class   | Order         | Taxa                           | Code |
|---------|---------------|--------------------------------|------|
| Insecta | Coleoptera    | <i>Laccophilus difficilis</i>  | C01  |
| Insecta | Coleoptera    | <i>Hydaticus grammicus</i>     | C02  |
| Insecta | Coleoptera    | <i>Berosus lewisius</i>        | C03  |
| Insecta | Coleoptera    | Haliplidae spp.                | C04  |
| Insecta | Coleoptera    | Helodidae spp.                 | C05  |
| Insecta | Coleoptera    | <i>Amphiops mater</i>          | C06  |
| Insecta | Coleoptera    | <i>Rhantus pulverosus</i>      | C07  |
| Insecta | Coleoptera    | <i>Enochrus simulans</i>       | C08  |
| Insecta | Coleoptera    | <i>Sternolophus rufipes</i>    | C09  |
| Insecta | Coleoptera    | Elmidae spp.                   | C10  |
| Insecta | Coleoptera    | <i>Galerucella nipponensis</i> | C11  |
| Insecta | Coleoptera    | <i>Noterus japonicus</i>       | C12  |
| Insecta | Coleoptera    | <i>Laccobius</i> spp.          | C13  |
| Insecta | Coleoptera    | <i>Helochares striatus</i>     | C14  |
| Insecta | Coleoptera    | <i>Peltodytes sinensis</i>     | C15  |
| Insecta | Diptera       | <i>Tipula</i> sp. 1            | D01  |
| Insecta | Diptera       | <i>Chironomus</i> spp.         | D02  |
| Insecta | Diptera       | Stratiomyiidae spp.            | D03  |
| Insecta | Diptera       | Ceratopogonidae spp.           | D04  |
| Insecta | Diptera       | <i>Anopheles</i> spp.          | D05  |
| Insecta | Diptera       | Ephydriidae spp.               | D06  |
| Insecta | Diptera       | Dixidae spp.                   | D07  |
| Insecta | Diptera       | <i>Aedes</i> spp.              | D08  |
| Insecta | Diptera       | <i>Anopheles</i> spp.          | D09  |
| Insecta | Diptera       | Dolichopodidae spp.            | D10  |
| Insecta | Diptera       | <i>Stratiomys japonica</i>     | D11  |
| Insecta | Diptera       | <i>Culicini</i> spp.           | D12  |
| Insecta | Diptera       | <i>Chaoborius</i> spp.         | D13  |
| Insecta | Ephemeroptera | <i>Procloeon pennulatum</i>    | E01  |
| Insecta | Ephemeroptera | <i>Baetis fuscatus</i>         | E02  |
| Insecta | Ephemeroptera | <i>Ephemerella orientalis</i>  | E03  |
| Insecta | Ephemeroptera | <i>Caenis</i> sp. 1            | E04  |
| Insecta | Ephemeroptera | <i>Cloeon dipterum</i>         | E05  |
| Insecta | Ephemeroptera | <i>Potamanthus formosus</i>    | E06  |
| Insecta | Ephemeroptera | <i>Ecdyonurus dracon</i>       | E07  |
| Insecta | Hemiptera     | <i>Diplonychus esakii</i>      | H01  |
| Insecta | Hemiptera     | <i>Ranatra chinensis</i>       | H02  |
| Insecta | Hemiptera     | <i>Plea indistinguenda</i>     | H03  |
| Insecta | Hemiptera     | <i>Micronecta sedula</i>       | H04  |
| Insecta | Hemiptera     | <i>Micronecta</i> spp.         | H05  |
| Insecta | Hemiptera     | <i>Muljarus japonicus</i>      | H06  |
| Insecta | Hemiptera     | <i>Sigara substriata</i>       | H07  |
| Insecta | Hemiptera     | <i>Aquarius paludum</i>        | H08  |
| Insecta | Lepidoptera   | <i>Cataclysta</i> spp.         | L01  |
| Insecta | Odonata       | <i>Trigomphus nigripes</i>     | O01  |
| Insecta | Odonata       | <i>Nihonogomphus</i> sp. 1     | O02  |
| Insecta | Odonata       | <i>Crocothemis servilia</i>    | O03  |
| Insecta | Odonata       | <i>Ceriagrion melanurum</i>    | O04  |

|                 |                    |                                    |     |
|-----------------|--------------------|------------------------------------|-----|
| Insecta         | Odonata            | <i>Macromia daimoji</i>            | O05 |
| Insecta         | Odonata            | <i>Pseudothemis zonata</i>         | O06 |
| Insecta         | Odonata            | <i>Paracercion calamorum</i>       | O07 |
| Insecta         | Odonata            | <i>Paracercion hieroglyphicum</i>  | O08 |
| Insecta         | Odonata            | <i>Orthetrum albistylum</i>        | O09 |
| Insecta         | Odonata            | <i>Deielia phaon</i>               | O10 |
| Insecta         | Odonata            | <i>Platycnemis phillopoda</i>      | O11 |
| Insecta         | Odonata            | <i>Epophthalmia elegans</i>        | O12 |
| Insecta         | Odonata            | Coenagrionidae spp.                | O13 |
| Insecta         | Odonata            | <i>Ischnura asiatica</i>           | O14 |
| Insecta         | Odonata            | <i>Anax parthenope julius</i>      | O15 |
| Insecta         | Trichoptera        | <i>Cheumatopsyche brevilineata</i> | T01 |
| Insecta         | Trichoptera        | <i>Molanna moesta</i>              | T02 |
| Insecta         | Trichoptera        | <i>Ecnomus tenellus</i>            | T03 |
| Insecta         | Trichoptera        | <i>Mystacides</i> sp. 1            | T04 |
| Bivalvia        | Unionoida          | <i>Unio douglasiae</i>             | N01 |
| Bivalvia        | Veneroida          | <i>Corbicula fluminea</i>          | N02 |
| Clitellata      | Arhynchobdellida   | <i>Erbobdella lineata</i>          | N03 |
| Clitellata      | Arhynchobdellida   | <i>Hirudo nipponia</i>             | N04 |
| Clitellata      | Rhynchobdellida    | <i>Glossiphonia complanata</i>     | N05 |
| Clitellata      | Rhynchobdellida    | <i>Alboglossiphonia lata</i>       | N06 |
| Clitellata      | Tubificida         | <i>Limnodrilus</i> spp.            | N07 |
| Clitellata      | Tubificida         | <i>Branchiura sowerbyi</i>         | N08 |
| Gastropoda      | Architaenioglossa  | <i>Sinotaia quadrata</i>           | N09 |
| Gastropoda      | Architaenioglossa  | <i>Cipangopaludina chinensis</i>   | N10 |
| Gastropoda      | Architaenioglossa  | <i>Pomacea canaliculata</i>        | N11 |
| Gastropoda      | Littorinimorpha    | <i>Parafossarulus manchouricus</i> | N12 |
| Gastropoda      | Systellommatophora | <i>Gyraulus chinensis</i>          | N13 |
| Gastropoda      | Systellommatophora | <i>Radix auricularia</i>           | N14 |
| Gastropoda      | Systellommatophora | <i>Laevapex nipponica</i>          | N15 |
| Gastropoda      | Systellommatophora | <i>Polypylis hemisphaerula</i>     | N16 |
| Gastropoda      | Systellommatophora | <i>Hippeutis cantori</i>           | N17 |
| Gastropoda      | Systellommatophora | <i>Austropeplea ollula</i>         | N18 |
| Gastropoda      | Systellommatophora | <i>Physa acuta</i>                 | N19 |
| Gastropoda      | Unassigned         | <i>Semisulcospira gottschei</i>    | N20 |
| Gastropoda      | Unassigned         | <i>Semisulcospira libertina</i>    | N21 |
| Gastropoda      | Unassigned         | <i>Semisulcospira forticosta</i>   | N22 |
| Malacostraca    | Decapoda           | <i>Caridina denticulata</i>        | N23 |
| Malacostraca    | Decapoda           | <i>Palaemon paucidens</i>          | N24 |
| Malacostraca    | Decapoda           | <i>Macrobrachium nipponense</i>    | N25 |
| Malacostraca    | Isopoda            | Asellidae spp.                     | N26 |
| Rhynchobdellida | Rhynchobdellida    | <i>Torix tagoi</i>                 | N27 |

**Table S3.** A list of references used for functional traits. References are given in References in the main text.

| Trait                     | Reference                                                          |
|---------------------------|--------------------------------------------------------------------|
| Voltinism                 | [30], [31], [32], [94], [95], [96], [97], [98], [99], [100], [101] |
| Adult life span           | [30], [31], [32], [94], [95], [98], [99], [100]                    |
| Size at maturity          | [30], [31], [32], [97]                                             |
| Functional feeding groups | [30], [31], [33], [34], [35]                                       |
